# Supplementary material for: Genome-Based Metabolic Reconstruction of a Novel Uncultivated Freshwater Magnetotactic coccus “Ca. Magnetaquicoccus inordinatus” UR-1, and Proposal of a Candidate Family “Ca. Magnetaquicoccaceae”
Source: Front Microbiol. 2019 Oct 2;10:2290. doi: 10.3389/fmicb.2019.02290 (PMC6783814; doi:10.3389/fmicb.2019.02290)
Supplement: Supplementary Table S5 — dDDH values between strains of the order Magnetococcales. Black boarders separate the representatives belonging to different putative families as was predicted by AAI analyses; Red boxes indicate same species; Orange boxes indicate putative same species. [file Table_5.XLSX]

## Sheet: Supplementary Table S5
Supplementary Table S5. dDDH values between strains of the order Magnetococcales
	UR-1	YD0425bin7	WMHbinv6	HCHbin5	WMHbin3	ER1bin7	HA3dbin1	HAa3bin1	DCbin2	DCbin4	WMHbin1	IT-1	MC-1	MO-1	HA3dbin3	DC0425bin3
UR-1	100	21.6	21.3	19.8	20.2	17	18.9	20	18.7	16.9	17.7	23.6	22.6	21.5	20.9	19
YD0425bin7	21.6	100	20.3	19.8	15.7	16.8	16.6	16.8	18.3	17.1	16.8	15.1	20.1	16.3	16.8	15.7
WMHbinv6	21.3	20.3	100	20.2	18	18.1	17.9	18.1	16.4	18.5	19	18.3	23.8	21.1	16.3	17
HCHbin5	19.8	19.8	20.2	100	19.6	19.3	17	17.1	17.2	19.3	17.8	22.6	20.5	23	18.2	18.7
WMHbin3	20.2	15.7	18	19.6	100	17.2	17.9	17.9	20.2	24.2	17.8	17.8	20	18.8	18.4	18.3
ER1bin7	17	16.8	18.1	19.3	17.2	100	16.2	15.4	15.8	15.7	16	17	18.1	15.8	17.6	18
HA3dbin1	18.9	16.6	17.9	17	17.9	16.2	100	62.6	19.4	20.1	20	17.7	16.2	17.2	19.1	16
HAa3bin1	20	16.8	18.1	17.1	17.9	15.4	62.6	100	19.5	20	20	17.7	16.7	16.9	23.8	15.8
DCbin2	18.7	18.3	16.4	17.2	20.2	15.8	19.4	19.5	100	21.5	22	20.6	17	19.5	18.6	19.4
DCbin4	16.9	17.1	18.5	19.3	24.2	15.7	20.1	20	21.5	100	93.3	15.2	22.4	33	17.5	17.8
WMHbin1	17.7	16.8	19	17.8	17.8	16	20	20	22	93.3	100	15.4	21	27.9	18	18.2
IT-1	23.6	15.1	18.3	22.6	17.8	17	17.7	17.7	20.6	15.2	15.4	100	20.2	18.5	18.3	17.5
MC-1	22.6	20.1	23.8	20.5	20	18.1	16.2	16.7	17	22.4	21	20.2	100	22.2	16	18.6
MO-1	21.5	16.3	21.1	23	18.8	15.8	17.2	16.9	19.5	33	27.9	18.5	22.2	100	16.8	17.5
HA3dbin3	20.9	16.8	16.3	18.2	18.4	17.6	19.1	23.8	18.6	17.5	18	18.3	16	16.8	100	18.8
DC0425bin3	19	15.7	17	18.7	18.3	18	16	15.8	19.4	17.8	18.2	17.5	18.6	17.5	18.8	100
		Same species			Possible same species			Family boundaries
